# Supplementary material for: Multimodal Physiological Assessment for Clinical Competency Classification in Simulation-Based Medical Education: A Machine Learning Approach
Source: Research Square preprint supplement (doi:10.21203/rs.3.rs-8842924/v1), 2026-02-22
Supplement: Supplementary file 1 [file 934b89fb642a1ebec9596a9b.docx]

**Supplementary Material**

**Complete Feature List**

*Table A1. Complete list of 65 physiological features selected through genetic algorithm optimization for stress detection. Features are organized by signal type (Heart Rate, Galvanic Skin Response, Temperature, and Acceleration), measurement category (deviation from baseline, above-baseline statistics, temporal characteristics, peak analysis, and frequency domain), and statistical measures*

| **Signal Type** | **Feature Category** | **Statistical Measure** | **Feature Name** | **Time Window (s)** |
| --- | --- | --- | --- | --- |
| **Heart Rate (HR)** | Deviation from Baseline | Mean | MEAN_HR_DEVS | 125-70 |
|  |  | Median | MEDIAN_HR_DEVS | 125-70 |
|  |  | Standard Deviation | STD_HR_DEVS | 125-70 |
|  |  | Kurtosis | KURT_HR_DEVS | 125-70 |
|  |  | Skewness | SKEW_HR_DEVS | 125-70 |
|  |  | Maximum | MAX_HR_DEVS | 125-70 |
|  |  | Minimum | MIN_HR_DEVS | 125-70 |
|  |  | Range | RANGE_HR_DEVS | 125-70 |
|  |  | Area Under Curve | AREA_HR_DEVS | 125-70 |
|  | Percent Above Baseline | Mean | MEAN_HR_Above_BASELINE | 125-70 |
|  |  | Median | MEDIAN_HR_Above_BASELINE | 125-70 |
|  |  | Mode | MODE_HR_Above_BASELINE | 125-70 |
|  |  | Kurtosis | KURT_HR_Above_BASELINE | 125-70 |
|  |  | Maximum | MAX_HR_Above_BASELINE | 125-70 |
|  |  | Minimum | MIN_HR_Above_BASELINE | 125-70 |
|  |  | Range | RANGE_HR_Above_BASELINE | 125-70 |
|  |  | Area Under Curve | AREA_HR_Above_BASELINE | 125-70 |
|  | Temporal | Time Above Baseline | HRTimeAbove_BASELINE | 125-70 |
| **Galvanic Skin Response (GSR)** | Deviation from Baseline | Mean | MEAN_GSR_DEVS | 80-180 |
|  |  | Median | MEDIAN_GSR_DEVS | 80-180 |
|  |  | Mode | MODE_GSR_DEVS | 80-180 |
|  |  | Standard Deviation | STD_GSR_DEVS | 80-180 |
|  |  | Kurtosis | KURT_GSR_DEVS | 80-180 |
|  |  | Skewness | SKEW_GSR_DEVS | 80-180 |
|  |  | Maximum | MAX_GSR_DEVS | 80-180 |
|  |  | Minimum | MIN_GSR_DEVS | 80-180 |
|  |  | Range | RANGE_GSR_DEVS | 80-180 |
|  |  | Area Under Curve | AREA_GSR_DEVS | 80-180 |
|  | Percent Above Baseline | Mean | MEAN_GSR_Above_BASELINE | 80-180 |
|  |  | Median | MEDIAN_GSR_Above_BASELINE | 80-180 |
|  |  | Mode | MODE_GSR_Above_BASELINE | 80-180 |
|  |  | Standard Deviation | STD_GSR_Above_BASELINE | 80-180 |
|  |  | Kurtosis | KURT_GSR_Above_BASELINE | 80-180 |
|  |  | Skewness | SKEW_GSR_Above_BASELINE | 80-180 |
|  |  | Maximum | MAX_GSR_Above_BASELINE | 80-180 |
|  |  | Minimum | MIN_GSR_Above_BASELINE | 80-180 |
|  |  | Area Under Curve | AREA_GSR_Above_BASELINE | 80-180 |
|  | Temporal | Time Above Baseline | GSRTimeAbove_BASELINE | 80-180 |
|  | Peak Analysis | Number of Peaks | GSR_NUM_PEAKS | 80-180 |
|  |  | Recovery Time | GSR_RECOVERY_TIME | 80-180 |
|  |  | Peak Amplitude | GSR_PEAK_AMPLITUDE | 80-180 |
|  | Frequency Domain | Low Frequency | GSR_LF | 80-180 |
|  |  | Very Low Frequency | GSR_VLF | 80-180 |
|  |  | Frequency Peak | GSR_FREQ_PEAK | 80-180 |
|  |  | Frequency Peak Count | GSR_FREQ_NUMPEAKS | 80-180 |
| **Temperature (TEMP)** | Deviation from Baseline | Mean | MEAN_TEMP_DEVS | 45-80 |
|  |  | Median | MEDIAN_TEMP_DEVS | 45-80 |
|  |  | Mode | MODE_TEMP_DEVS | 45-80 |
|  |  | Standard Deviation | STD_TEMP_DEVS | 45-80 |
|  |  | Skewness | SKEW_TEMP_DEVS | 45-80 |
|  |  | Maximum | MAX_TEMP_DEVS | 45-80 |
|  |  | Minimum | MIN_TEMP_DEVS | 45-80 |
|  |  | Range | RANGE_TEMP_DEVS | 45-80 |
|  |  | Area Under Curve | AREA_TEMP_DEVS | 45-80 |
|  | Percent Above Baseline | Median | MEDIAN_TEMP_Above_BASELINE | 45-80 |
|  |  | Mode | MODE_TEMP_Above_BASELINE | 45-80 |
|  |  | Standard Deviation | STD_TEMP_Above_BASELINE | 45-80 |
|  |  | Kurtosis | KURT_TEMP_Above_BASELINE | 45-80 |
|  |  | Skewness | SKEW_TEMP_Above_BASELINE | 45-80 |
|  |  | Minimum | MIN_TEMP_Above_BASELINE | 45-80 |
|  |  | Range | RANGE_TEMP_Above_BASELINE | 45-80 |
|  |  | Area Under Curve | AREA_TEMP_Above_BASELINE | 45-80 |
|  | Temporal | Time Above Baseline | TEMPTimeAbove_BASELINE | 45-80 |
| **Acceleration** | Motion Metrics | Mean | MeanAcceleration | 125-70 |
|  |  | Standard Deviation | STD_Acceleration | 125-70 |

*Table A 2. Comprehensive performance metrics across 21 classification thresholds (0.00–1.00) evaluated through 20 independent leave-n-out validations. Values represent mean ± standard deviation across validation folds. The optimal threshold of 0.50 (bold) maximizes both balanced accuracy (0.845 ± 0.042) and Matthews Correlation Coefficient (0.706 ± 0.061), representing the best trade-off between sensitivity (0.952 ± 0.023) and specificity (0.739 ± 0.093). PR-AUC remains remarkably stable across thresholds (0.968–0.971), indicating robust discrimination ability independent of operating point. The performance plateau observed between thresholds 0.30–0.70 (balanced accuracy range: 0.833–0.848) provides operational flexibility for clinical implementation. Confusion matrix components (nTP, nFP, nTN, nFN) represent total counts aggregated across all 20 validations. The dramatic performance degradation at classification threshold (Class Thresh) 1.00 (balanced accuracy: 0.575, F1: 0.268) reflects the extreme classification criterion requiring absolute certainty. PPV = Positive Predictive Value; NPV = Negative Predictive Value.*

**Comprehensive Model Performance Analysis**

| Class  Thresh | Bal. Acc | F1 Score | MCC | PR-AUC | Sens | Spec | PPV | NPV | nTP | nFP | nTN | nFN |
| --- | --- | --- | --- | --- | --- | --- | --- | --- | --- | --- | --- | --- |
| 0.00 | *0.500 ± 0.000* | *0.898 ± 0.000* | *0.000 ± 0.000* | *0.969 ± 0.011* | *1.000 ± 0.000* | *0.000 ± 0.000* | *0.816 ± 0.000* | *0.000 ± 0.000* | *3540* | *800* | *0* | *0* |
| 0.05 | *0.767 ± 0.052* | *0.941 ± 0.010* | *0.636 ± 0.077* | *0.969 ± 0.012* | *0.978 ± 0.013* | *0.555 ± 0.107* | *0.907 ± 0.020* | *0.860 ± 0.072* | *3463* | *356* | *444* | *77* |
| 0.10 | *0.792 ± 0.048* | *0.945 ± 0.011* | *0.667 ± 0.072* | *0.969 ± 0.012* | *0.973 ± 0.018* | *0.611 ± 0.102* | *0.918 ± 0.019* | *0.849 ± 0.081* | *3446* | *311* | *489* | *94* |
| 0.15 | *0.808 ± 0.043* | *0.946 ± 0.011* | *0.683 ± 0.067* | *0.969 ± 0.012* | *0.970 ± 0.017* | *0.645 ± 0.090* | *0.924 ± 0.018* | *0.837 ± 0.069* | *3435* | *284* | *516* | *105* |
| 0.20 | *0.817 ± 0.044* | *0.946 ± 0.011* | *0.688 ± 0.066* | *0.969 ± 0.012* | *0.966 ± 0.018* | *0.667 ± 0.093* | *0.928 ± 0.018* | *0.822 ± 0.070* | *3419* | *266* | *534* | *121* |
| 0.25 | *0.825 ± 0.046* | *0.946 ± 0.011* | *0.691 ± 0.064* | *0.970 ± 0.011* | *0.960 ± 0.023* | *0.689 ± 0.100* | *0.932 ± 0.020* | *0.809 ± 0.080* | *3400* | *249* | *551* | *140* |
| 0.30 | *0.833 ± 0.036* | *0.947 ± 0.010* | *0.700 ± 0.057* | *0.970 ± 0.012* | *0.959 ± 0.018* | *0.708 ± 0.076* | *0.936 ± 0.015* | *0.803 ± 0.068* | *3395* | *234* | *566* | *145* |
| 0.35 | *0.837 ± 0.038* | *0.947 ± 0.010* | *0.702 ± 0.056* | *0.971 ± 0.012* | *0.956 ± 0.020* | *0.719 ± 0.085* | *0.938 ± 0.017* | *0.796 ± 0.068* | *3385* | *225* | *575* | *155* |
| **0.40** | ***0.837 ± 0.036*** | ***0.947 ± 0.010*** | ***0.702 ± 0.057*** | ***0.970 ± 0.012*** | ***0.957 ± 0.020*** | ***0.716 ± 0.078*** | ***0.938 ± 0.016*** | ***0.797 ± 0.068*** | ***3388*** | ***227*** | ***573*** | ***152*** |
| **0.45** | ***0.841 ± 0.041*** | ***0.947 ± 0.011*** | ***0.704 ± 0.059*** | ***0.969 ± 0.012*** | ***0.954 ± 0.022*** | ***0.729 ± 0.090*** | ***0.940 ± 0.018*** | ***0.788 ± 0.067*** | ***3376*** | ***217*** | ***583*** | ***164*** |
| ***0.50*** | ***0.845 ± 0.042*** | ***0.947 ± 0.011*** | ***0.706 ± 0.061*** | ***0.968 ± 0.012*** | ***0.952 ± 0.023*** | ***0.739 ± 0.093*** | ***0.942 ± 0.019*** | ***0.784 ± 0.067*** | ***3369*** | ***209*** | ***591*** | ***171*** |
| **0.55** | ***0.845 ± 0.039*** | ***0.943 ± 0.013*** | ***0.696 ± 0.061*** | ***0.968 ± 0.012*** | ***0.944 ± 0.025*** | ***0.746 ± 0.086*** | ***0.943 ± 0.018*** | ***0.760 ± 0.069*** | ***3343*** | ***203*** | ***597*** | ***197*** |
| **0.60** | ***0.847 ± 0.040*** | ***0.943 ± 0.013*** | ***0.695 ± 0.063*** | ***0.969 ± 0.012*** | ***0.943 ± 0.025*** | ***0.751 ± 0.086*** | ***0.944 ± 0.018*** | ***0.755 ± 0.069*** | ***3337*** | ***199*** | ***601*** | ***203*** |
| **0.65** | ***0.847 ± 0.043*** | ***0.940 ± 0.017*** | ***0.690 ± 0.064*** | ***0.969 ± 0.012*** | ***0.935 ± 0.039*** | ***0.760 ± 0.104*** | ***0.946 ± 0.021*** | ***0.744 ± 0.098*** | ***3309*** | ***192*** | ***608*** | ***231*** |
| **0.70** | ***0.848 ± 0.041*** | ***0.939 ± 0.017*** | ***0.687 ± 0.066*** | ***0.970 ± 0.011*** | ***0.933 ± 0.036*** | ***0.762 ± 0.096*** | ***0.946 ± 0.020*** | ***0.737 ± 0.093*** | ***3304*** | ***190*** | ***610*** | ***236*** |
| 0.75 | *0.847 ± 0.043* | *0.939 ± 0.014* | *0.682 ± 0.070* | *0.970 ± 0.010* | *0.934 ± 0.025* | *0.760 ± 0.090* | *0.946 ± 0.019* | *0.728 ± 0.071* | *3305* | *192* | *608* | *235* |
| 0.80 | *0.841 ± 0.042* | *0.939 ± 0.013* | *0.678 ± 0.065* | *0.970 ± 0.011* | *0.937 ± 0.025* | *0.744 ± 0.092* | *0.942 ± 0.019* | *0.736 ± 0.071* | *3318* | *205* | *595* | *222* |
| 0.85 | *0.843 ± 0.039* | *0.933 ± 0.015* | *0.663 ± 0.063* | *0.968 ± 0.010* | *0.922 ± 0.030* | *0.764 ± 0.086* | *0.946 ± 0.018* | *0.698 ± 0.069* | *3265* | *189* | *611* | *275* |
| 0.90 | *0.844 ± 0.042* | *0.926 ± 0.018* | *0.648 ± 0.070* | *0.968 ± 0.012* | *0.906 ± 0.037* | *0.782 ± 0.094* | *0.949 ± 0.020* | *0.663 ± 0.078* | *3207* | *174* | *626* | *333* |
| 0.95 | *0.842 ± 0.038* | *0.912 ± 0.030* | *0.621 ± 0.074* | *0.968 ± 0.013* | *0.876 ± 0.057* | *0.809 ± 0.086* | *0.954 ± 0.019* | *0.612 ± 0.090* | *3101* | *153* | *647* | *439* |
| 1.00 | *0.575 ± 0.038* | *0.268 ± 0.128* | *0.169 ± 0.049* | *0.967 ± 0.012* | *0.161 ± 0.088* | *0.989 ± 0.021* | *0.990 ± 0.016* | *0.212 ± 0.016* | *571* | *9* | *791* | *2969* |
